# Supplementary material for: Near-infrared absorbing non-fullerene acceptors with selenophene as π bridges for efficient organic solar cells
Source: Royal Society of Chemistry journal article supplement (doi:10.1039/c8ta00783g), 2018-01-01
Supplement: c8ta00783g1.pdf [file c8ta00783g1.pdf]

## Electronic Supplementary Information

### **Near-infrared absorbing non-fullerene acceptors with selenophene as $\pi$ bridge for efficient organic solar cells**

Ziqi Liang,<sup>a, b</sup> Miaomiao Li,<sup>\*a, b</sup> Xiaomei Zhang,<sup>a, b</sup> Qi Wang,<sup>a, b</sup> Yu Jiang,<sup>c</sup> Hongkun Tian<sup>c</sup>  
and Yanhou Geng<sup>a, b</sup>

<sup>a</sup> School of Materials Science and Engineering and Tianjin Key Laboratory of Molecular Optoelectronic Science, Tianjin University, Tianjin 300072, P. R. China. E-mail: [miaomiao.li@tju.edu.cn](mailto:miaomiao.li@tju.edu.cn)

<sup>b</sup> Collaborative Innovation Center of Chemical Science and Engineering (Tianjin), Tianjin University, Tianjin 300072, P. R. China.

<sup>c</sup> State Key Laboratory of Polymer Physics and Chemistry, Changchun Institute of Applied Chemistry, Chinese Academy of Sciences, Changchun, 130022, P. R. China.

## Table of Contents

|                                                                                                                                                                                       |       |
|---------------------------------------------------------------------------------------------------------------------------------------------------------------------------------------|-------|
| 1. Instruments .....                                                                                                                                                                  | 3     |
| 2. Fabrication and characterization of OSC devices .....                                                                                                                              | 4     |
| 3. Fabrication and characterization of SCLC devices .....                                                                                                                             | 5     |
| 4. Supplementary data .....                                                                                                                                                           | 6     |
| <b>Fig. S1-S6</b> <sup>1</sup> H NMR and <sup>13</sup> C NMR spectra of the compounds.....                                                                                            | 6-8   |
| <b>Fig. S7-S9</b> The MALDI-TOF mass spectra of the compounds.....                                                                                                                    | 9-10  |
| <b>Fig. S10</b> TGA curves of <b>IDT2Se</b> and <b>IDT2Se-4F</b> .....                                                                                                                | 10    |
| <b>Fig. S11</b> DSC curves of <b>IDT2Se</b> and <b>IDT2Se-4F</b> .....                                                                                                                | 10    |
| <b>Table S1.</b> Crystal data and structure refinement for <b>IDT2Se-4F</b> .....                                                                                                     | 11    |
| <b>Fig. S12</b> Thin film cyclic voltammograms of <b>IDT2Se</b> and <b>IDT2Se-4F</b> .....                                                                                            | 12    |
| <b>Fig. S13</b> Absorption spectra of the blend films with different treatments.....                                                                                                  | 12    |
| <b>Fig. S14</b> Chemical structure of PDINO.....                                                                                                                                      | 12    |
| <b>Table S1-S3.</b> The detailed photovoltaic performances of the OSCs with different D:A ratio, active layer thickness and post treatments.....                                      | 12-14 |
| <b>Figure. S15.</b> The fitted dark injected current ( $J_{inj}$ ) versus voltage ( $V$ ) for the devices based on PBDB-T: <b>IDT2Se-4F</b> blend films with different treatment..... | 14    |
| <b>Table S4.</b> Measured and simulated performance parameters from the dark $J_{inj}-V$ curves.....                                                                                  | 15    |
| <b>Fig. S16-S18</b> Photo, thermal and air stability of the OSCs based <b>IDT2Se</b> and <b>IDT2Se-4F</b> .....                                                                       | 15-16 |
| <b>Fig. S19</b> AFM images of PBDB-T: <b>IDT2Se</b> and PBDB-T: <b>IDT2Se-4F</b> blend films after continuous illumination and heating, and exposure in air.....                      | 17    |
| <b>Fig. S20</b> $J-V$ characteristics for the SCLC devices.....                                                                                                                       | 18    |
| <b>Table S5</b> Carrier mobility of the SCLC devices.....                                                                                                                             | 18    |
| <b>Fig. S21 and S22</b> In-plane and out-of-plane XRD patterns of <b>IDT2Se</b> , <b>IDT2Se-4F</b> and PBDB-T neat films.....                                                         | 19    |

## 1. Instruments

$^1\text{H}$  NMR and  $^{13}\text{C}$  NMR spectra were measured at room temperature by a Bruker AV 400-MHz spectrometer with  $\text{CDCl}_3$  as the solvent and tetramethylsilane (TMS) as internal standard. Matrix-assisted laser desorption ionization time-of-flight (MALDI-TOF) mass spectra were recorded on a Bruker/AutoflexIII Smartbean MALDI mass spectrometer with 2-[(2E)-3-(4-*tert*-butylphenyl)-2-methylprop-2-enylidene]malononitrile (DCTB) as the matrix in a reflection mode. Elemental analysis was measured by a FlashEA1112 elemental analyzer. Thermogravimetric analysis (TGA) was conducted on Perkin-Elmer TGA-7 at a heating rate of  $10\text{ }^\circ\text{C}/\text{min}$  under  $\text{N}_2$  and differential scanning calorimetry (DSC) was performed by a Perkin-Elmer DSC7 thermal analyzer with a heating/cooling rate of  $\pm 10\text{ }^\circ\text{C}/\text{min}$  under  $\text{N}_2$ . DFT calculation was carried out using Gaussian 09 with a hybrid B3LYP correlation functional and 6-31G (d) basis set, and all alkyl substituents were replaced with methyl groups in order to simplify the calculations. UV-*vis*-NIR absorption spectra were obtained on a Shimadzu UV-3600 Plus spectrometer. Film cyclic voltamograms (CV) were measured using a CHI660 electrochemical analyzer with a three-electrode cell at a scan rate of  $100\text{ mV}/\text{s}$  in anhydrous acetonitrile ( $\text{CH}_3\text{CN}$ ) with tetrabutylammonium hexafluorophosphate ( $\text{Bu}_4\text{NPF}_6$ ,  $0.1\text{ mol}/\text{L}$ ) as the supporting electrolyte. A glassy carbon with  $10\text{ mm}$  diameter, a Pt wire and a saturated calomel electrode (SCE) were used as working, counter and reference electrodes, respectively. The films were spin coated on the working electrode for CV measurements.  $E_{onset}^{ox}$  and  $E_{onset}^{re}$  are oxidation and reduction onsets, respectively, against the half potential of ferrocene/ferrocenium ( $\text{Fc}/\text{Fc}^+$ ) ( $E^0 = 0.39\text{ V}$ ), as determined in CV curves. The HOMO and LUMO energy levels were estimated by the equations:  $\text{HOMO} = -(4.8 + E_{onset}^{ox})\text{ eV}$ ,  $\text{LUMO} =$

$-(4.8 + E_{onset}^{re})$  eV, respectively. The molecular weight of polymer PBDB-T was determined via high-temperature gel permeation chromatography (GPC) on a PL-GPC 220 system at 150 °C, with 1,2,4-trichlorobenzene as eluent and monodisperse polystyrene as standard. Atomic force microscopy (AFM) images were recorded in tapping mode on a Bruker MultiMode 8 atomic force microscope. Transmission electron microscopy (TEM) images were recorded on a JEM-1011 transmission electron microscope with accelerating voltage of 100 KV and camera length of 160 cm. Out-of-plane XRD was measured with a Bruker D8 Advance using CuK $\alpha$  radiation ( $\lambda = 1.54056$  Å) and operated at 40 kV and 30 mA, and in-plane XRD was conducted on a Rigaku Smart Lab with CuK $\alpha$  source ( $\lambda = 1.54056$  Å).

## **2. Fabrication and characterization of OSC devices**

The devices with an architecture of glass/ITO/PEDOT:PSS (40 nm)/PBDB-T:acceptor/PDINO/Al (100 nm) were fabricated. The ITO coated glass substrates were cleaned ultrasonically with detergent, deionized water, acetone and isopropanol under ultrasonication for 15 min each. The dried ITO was treated with UV-ozone for 20 min, and then solution of PEDOT:PSS (Baytron P AI 4083) was spin-coated (ca. 40 nm thick) onto the surface. The substrates were then placed into an argon-filled glove box after being baked at 150 °C for 20 min. Subsequently, the active layer was spin-coated from donor (10 mg/mL) and acceptor (10 mg/mL) in CB solution for 60 s on the ITO/PEDOT:PSS substrate. The active layer thickness was measured using a Dektak150 profilometer. And then, PDINO, with CH<sub>3</sub>OH as solvent (1 mg/mL), was spin-coated at 3000 rpm for 40 s on the active layers. Finally, a 100 nm Al layer was deposited on the PDINO layer under high vacuum ( $< 1.5 \times 10^{-4}$  Pa). The effective area of each cell is 4 mm<sup>2</sup>, as defined by masks for the solar cell devices. Keithley 2400 source

meter was used to measure  $J$ - $V$  curves under 100 mW cm<sup>-2</sup> AM 1.5G simulated solar light illumination provided by an AAA solar simulator (SS-F5-3A, Enli Technology Co. Ltd) calibrated with a standard photovoltaic cell equipped with a KG5 filter in a glove box. The EQE data were obtained using a solar cell spectral response measurement system (QE-R, Enli Technology Co. Ltd).

### 3. Fabrication and characterization of SCLC devices

Hole-only devices with an architecture of ITO/PEDOT:PSS (40 nm)/ PBDB-T:acceptor/Au (100 nm) and electron-only devices with an architecture of glass/Al (100 nm)/PBDB-T:acceptor/Al (100 nm) were fabricated. The devices were measured using Keithley 2400 source meter in a glove box under dark. The hole and electron mobilities were calculated by fitting the dark current using the Mott-Gurney relationship:

$$J = \frac{9}{8} \varepsilon_0 \varepsilon_r \mu \frac{V^2}{L^3}$$

where  $J$  is the current density,  $L$  is the film thickness of the active layer,  $\mu$  is the hole or electron mobility,  $\varepsilon_r$  is the relative dielectric constant of the transport medium,  $\varepsilon_0$  is the permittivity of free space ( $8.85 \times 10^{-12}$  F m<sup>-1</sup>),  $V$  ( $= V_{\text{appl}} - V_{\text{bi}}$ ) is the internal voltage in the device, where  $V_{\text{appl}}$  is the applied voltage to the device and  $V_{\text{bi}}$  is the built-in voltage due to the relative work function difference of the two electrodes.

## 4. Supplementary data

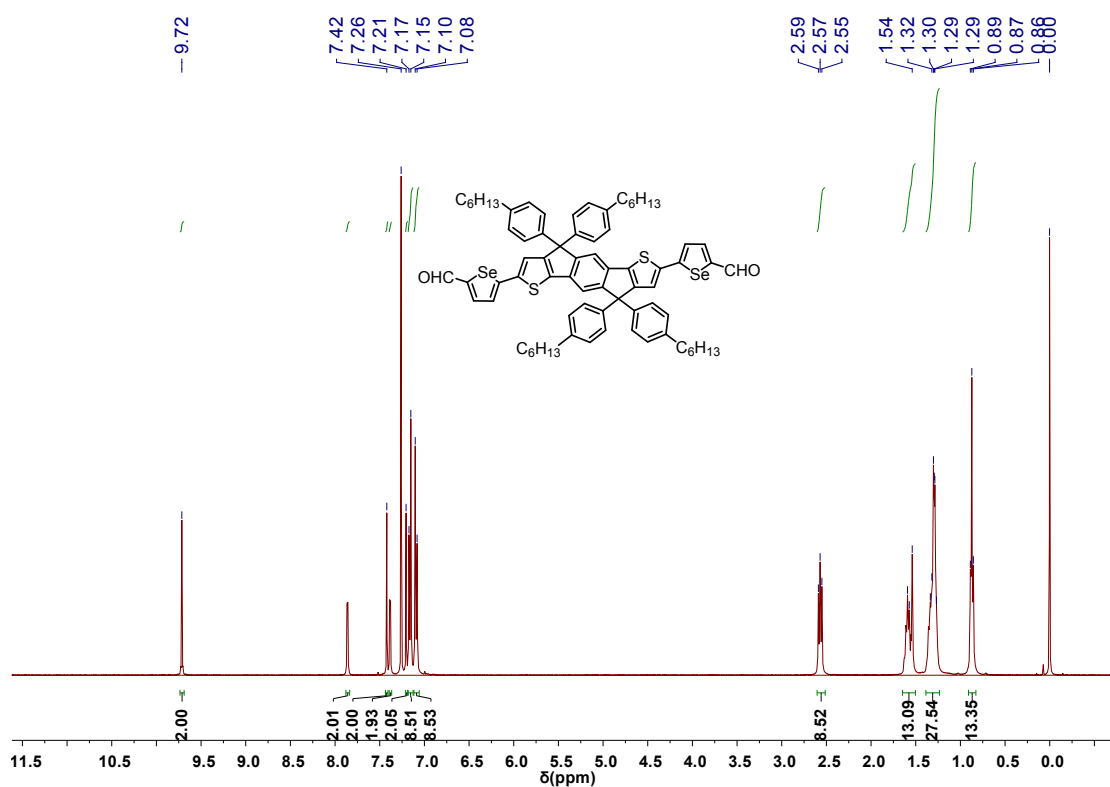

Fig. S1  $^1\text{H}$  NMR spectrum of compound 2.

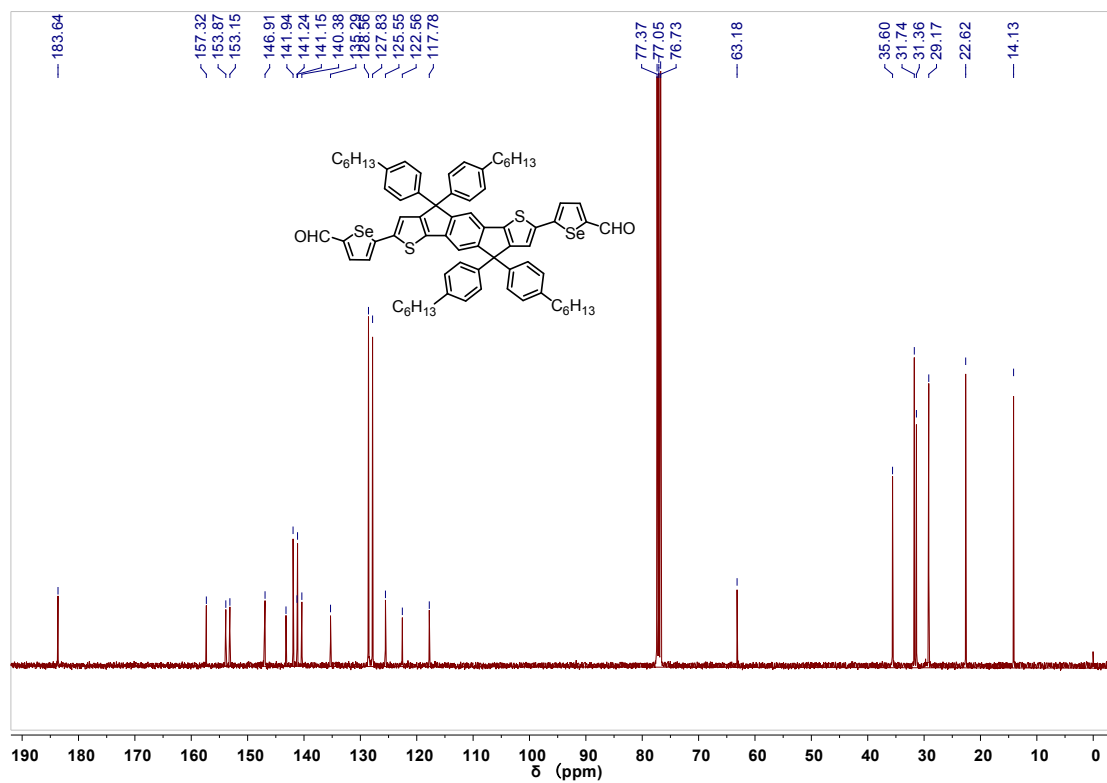

Fig. S2  $^{13}\text{C}$  NMR spectrum of compound 2.

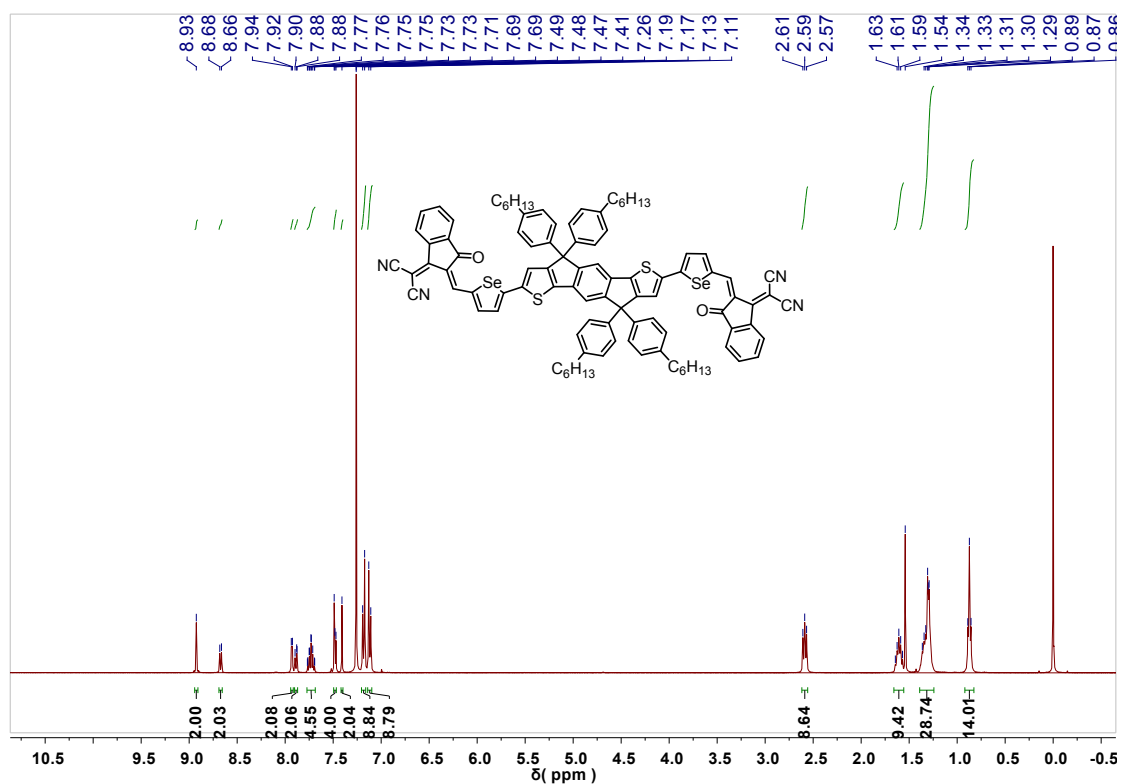

Fig. S3 <sup>1</sup>H NMR spectrum of IDT2Se.

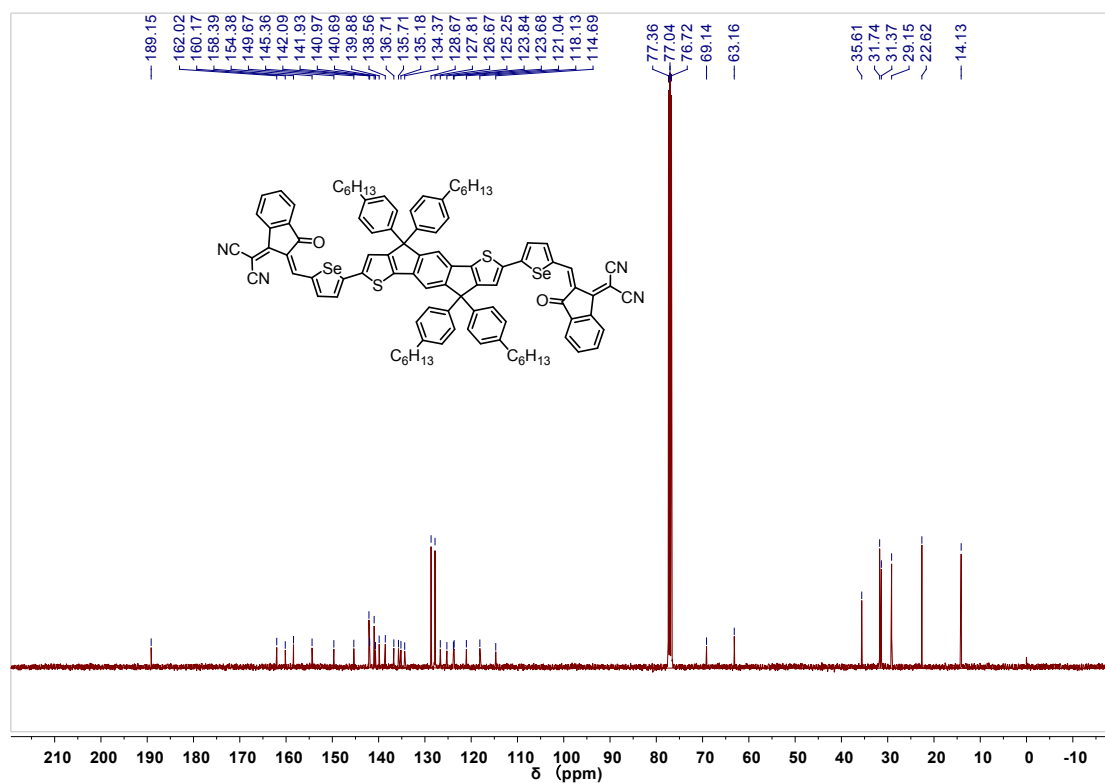

Fig. S4 <sup>13</sup>C NMR spectrum of IDT2Se.

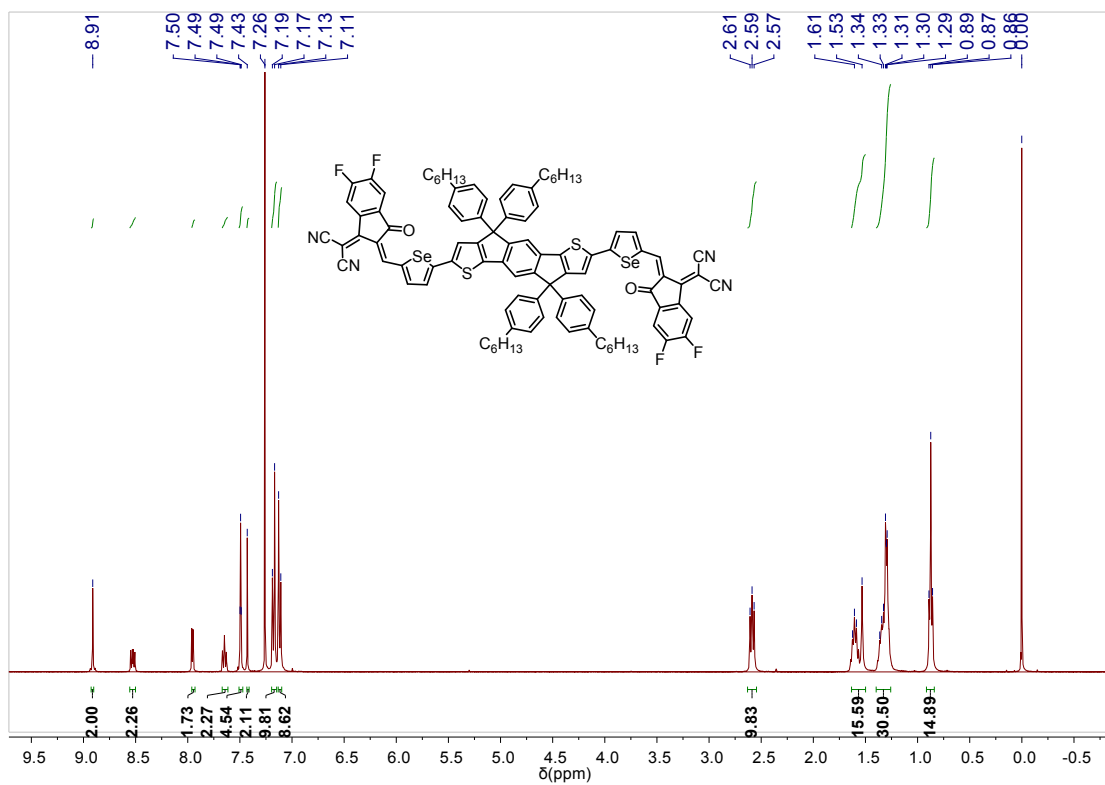

Fig. S5  $^1\text{H}$  NMR spectrum of IDT2Se-4F.

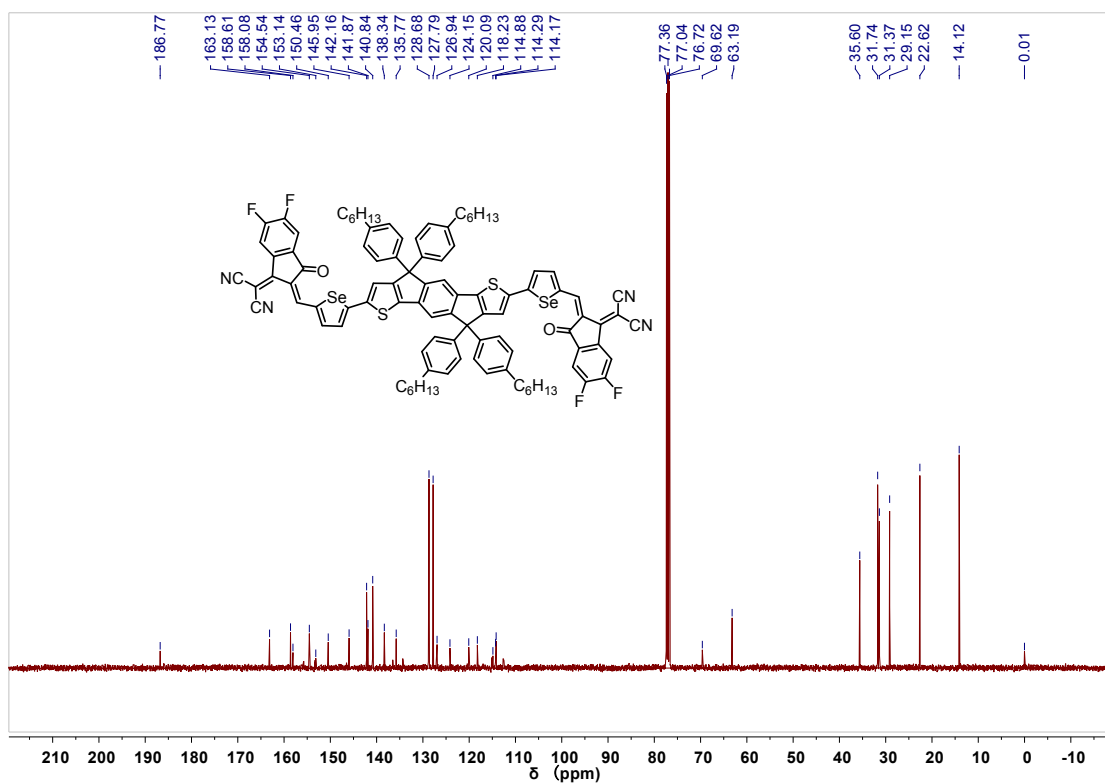

Fig. S6  $^{13}\text{C}$  NMR spectrum of IDT2Se-4F.



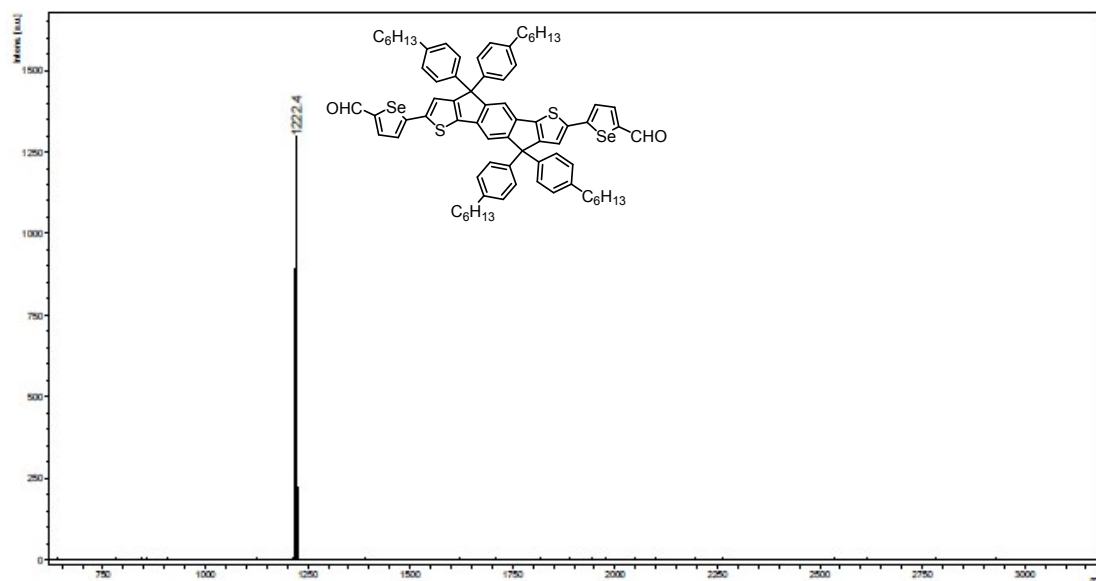

**Fig. S7** The MALDI-TOF mass spectrum of compound **2**.

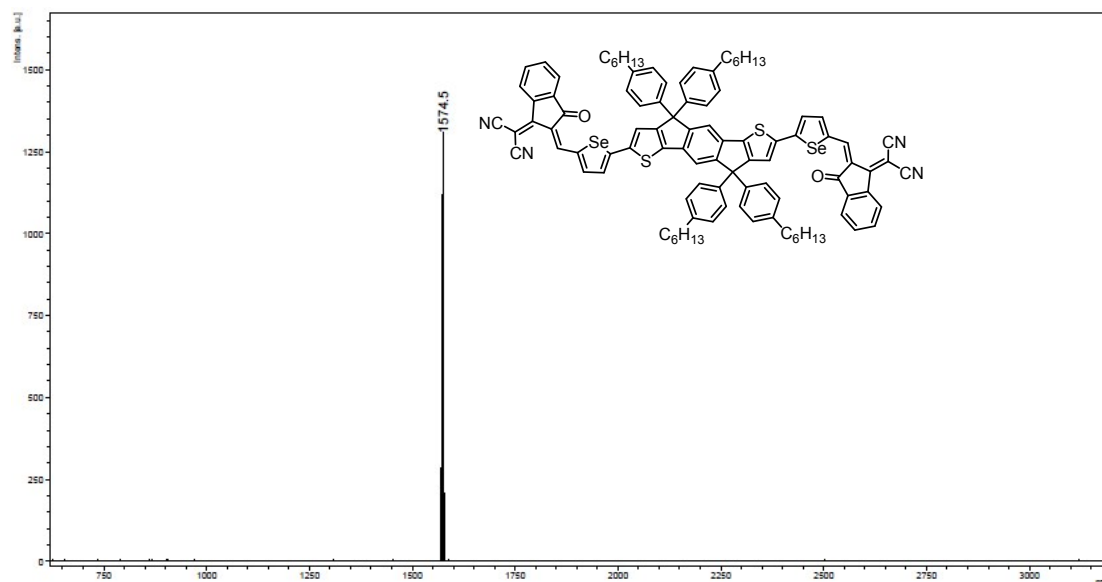

**Fig. S8** The MALDI-TOF mass spectrum of **IDT2Se**.

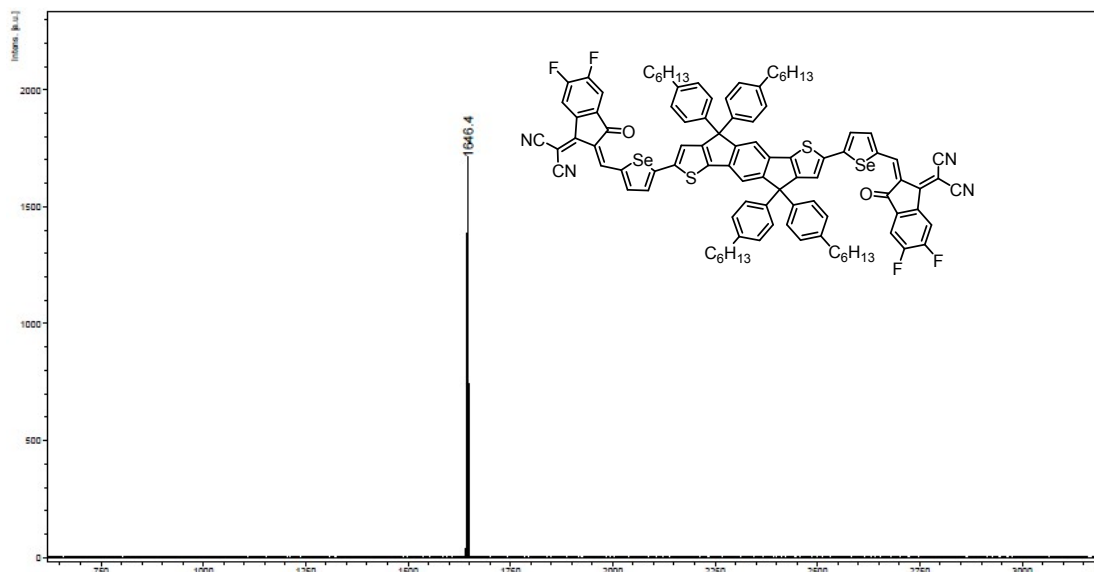

**Fig. S9** The MALDI-TOF mass spectrum of **IDT2Se-4F**.

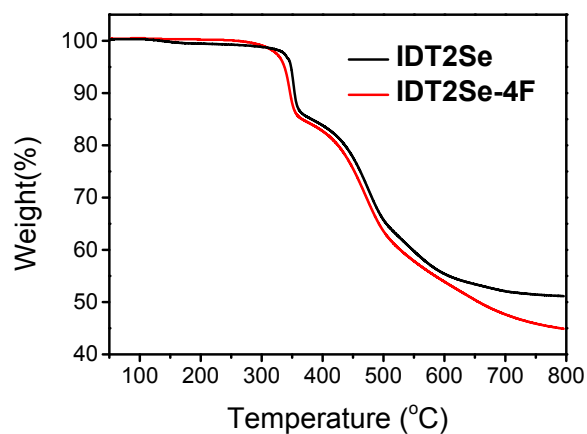

**Fig. S10** TGA curves of **IDT2Se** and **IDT2Se-4F** in nitrogen with a heating rate of 10 °C/min.

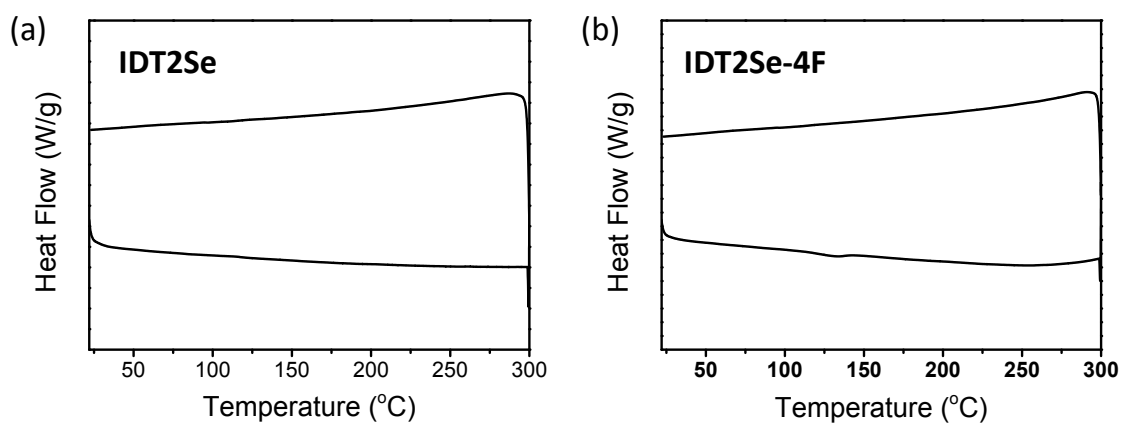

**Fig. S11** The first cooling and the second heating DSC curves of **IDT2Se** and **IDT2Se-4F** in  $N_2$  with a heating/cooling rate of 10 °C/min.

**Table S1.** Crystal data and structure refinement for **IDT2Se-4F**.<sup>a</sup>

|                                   |                                                                                                             |                |
|-----------------------------------|-------------------------------------------------------------------------------------------------------------|----------------|
| Identification code               | <b>IDT2Se-4F</b>                                                                                            |                |
| Empirical formula                 | C <sub>98</sub> H <sub>82</sub> F <sub>4</sub> N <sub>4</sub> O <sub>2</sub> S <sub>2</sub> Se <sub>2</sub> |                |
| Formula weight                    | 1645.71                                                                                                     |                |
| Temperature                       | 120.0(1) K                                                                                                  |                |
| Wavelength                        | 0.71073 Å                                                                                                   |                |
| Crystal system                    | Monoclinic                                                                                                  |                |
| Space group                       | C2/c                                                                                                        |                |
| Unit cell dimensions              | a = 31.859(7) Å                                                                                             | α = 90°.       |
|                                   | b = 16.153(4) Å                                                                                             | β = 94.79(3)°. |
|                                   | c = 16.230(7) Å                                                                                             | γ = 90°.       |
| Volume                            | 8323(5) Å <sup>3</sup>                                                                                      |                |
| Z                                 | 4                                                                                                           |                |
| Density (calculated)              | 1.313 Mg/m <sup>3</sup>                                                                                     |                |
| Absorption coefficient            | 1.000 mm <sup>-1</sup>                                                                                      |                |
| F(000)                            | 3400                                                                                                        |                |
| Crystal size                      | 0.300 x 0.280 x 0.250 mm <sup>3</sup>                                                                       |                |
| Theta range for data collection   | 3.141 to 25.009°.                                                                                           |                |
| Index ranges                      | -33 ≤ h ≤ 37, -19 ≤ k ≤ 17, -19 ≤ l ≤ 19                                                                    |                |
| Reflections collected             | 26687                                                                                                       |                |
| Independent reflections           | 7330 [R(int) = 0.0993]                                                                                      |                |
| Completeness to theta = 25.009°   | 99.8 %                                                                                                      |                |
| Absorption correction             | Semi-empirical from equivalents                                                                             |                |
| Max. and min. transmission        | 1.00000 and 0.62411                                                                                         |                |
| Refinement method                 | Full-matrix least-squares on F <sup>2</sup>                                                                 |                |
| Data / restraints / parameters    | 7330 / 43 / 506                                                                                             |                |
| Goodness-of-fit on F <sup>2</sup> | 1.027                                                                                                       |                |
| Final R indices [I > 2σ(I)]       | R1 = 0.1058, wR2 = 0.2630                                                                                   |                |
| R indices (all data)              | R1 = 0.2002, wR2 = 0.3438                                                                                   |                |
| Extinction coefficient            | n/a                                                                                                         |                |
| Largest diff. peak and hole       | 1.828 and -0.618 e.Å <sup>-3</sup>                                                                          |                |

<sup>a</sup> CCDC number: 1818833

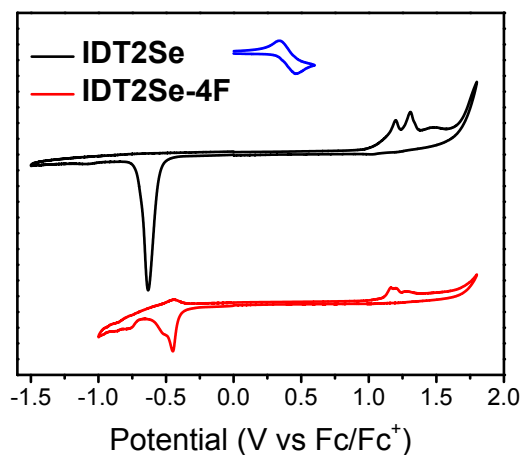

**Fig. S12** Thin film cyclic voltammograms (CV) of IDT2Se and IDT2Se-4F.

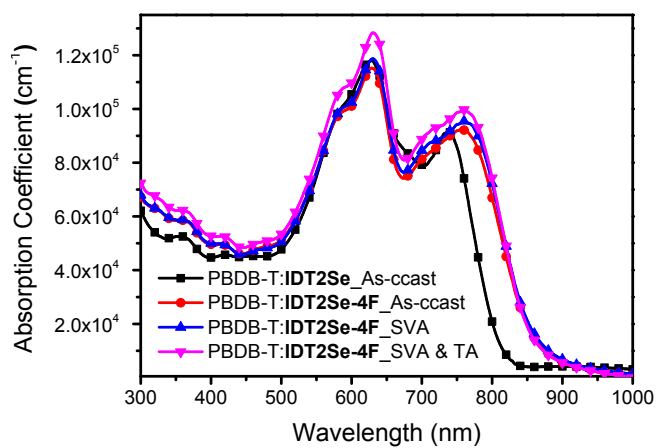

**Fig. S13** Absorption spectra of PBDB-T:IDT2Se and PBDB-T:IDT2Se-4F blend films with different treatments. Donor:acceptor weight ratio: 1:1.

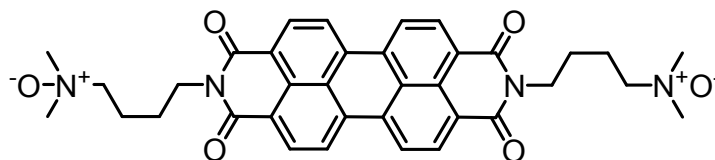

**Fig. S14** Chemical structure of PDINO.

**Table S2.** The detailed photovoltaic performances of OSCs based on PBDB-T:**IDT2Se** and PBDB-T:**IDT2Se-4F** with different D:A ratio (wt:wt). The active layer thickness is ~110 nm. <sup>a</sup>

| Acceptor         | D:A ratio | $V_{oc}$ (V)     | $J_{sc}$ (mA/cm <sup>2</sup> ) | FF (%)          | PCE (%)          |
|------------------|-----------|------------------|--------------------------------|-----------------|------------------|
| <b>IDT2Se</b>    | 1:0.8     | 0.89±0.01 (0.89) | 16.69±0.25 (16.89)             | 57.5±1.0 (58.3) | 8.54±0.22 (8.76) |
|                  | 1:1       | 0.89±0.01 (0.89) | 17.05±0.25 (17.08)             | 58.0±0.9 (58.6) | 8.80±0.19 (8.91) |
|                  | 1:1.2     | 0.89±0.01 (0.89) | 17.62±0.23 (17.78)             | 55.1±0.9 (55.7) | 8.64±0.18 (8.82) |
| <b>IDT2Se-4F</b> | 1:0.8     | 0.81±0.01 (0.82) | 18.77±0.31 (19.08)             | 61.7±1.2 (62.3) | 9.38±0.37 (9.75) |
|                  | 1:1       | 0.81±0.01 (0.81) | 19.18±0.15 (19.28)             | 62.3±1.0 (63.0) | 9.68±0.16(9.84)  |
|                  | 1:1.2     | 0.81±0.01 (0.81) | 20.01±0.35 (20.39)             | 58.6±0.9 (59.1) | 9.50±0.26 (9.76) |

<sup>a</sup> Statistical and optimal results are listed outside of parentheses and in parentheses, respectively. The average values are obtained from over 15 devices.

**Table S3.** The detailed photovoltaic performances of OSCs based on PBDB-T:**IDT2Se** and PBDB-T:**IDT2Se-4F** with different active layer thickness. The D:A ratio (wt:wt) is 1:1. <sup>a</sup>

| Acceptor         | Thickness (nm) | $V_{oc}$ (V)     | $J_{sc}$ (mA/cm <sup>2</sup> ) | FF (%)          | PCE (%)          |
|------------------|----------------|------------------|--------------------------------|-----------------|------------------|
| <b>IDT2Se</b>    | 80             | 0.89±0.01 (0.89) | 16.00±0.32 (16.17)             | 60.0±1.0 (61.0) | 8.54±0.24 (8.78) |
|                  | 110            | 0.89±0.01 (0.89) | 17.05±0.25 (17.08)             | 58.0±0.9 (58.6) | 8.80±0.19 (8.91) |
|                  | 130            | 0.89±0.01 (0.89) | 16.51±0.19 (16.58)             | 57.1±1.0 (57.8) | 8.39±0.14 (8.53) |
| <b>IDT2Se-4F</b> | 80             | 0.81±0.01 (0.81) | 18.24±0.0.30 (18.53)           | 63.8±0.8 (64.6) | 9.43±0.27 (9.70) |
|                  | 110            | 0.81±0.01 (0.81) | 19.18±0.15 (19.28)             | 62.3±1.0 (63.0) | 9.68±0.16(9.84)  |
|                  | 130            | 0.81±0.01 (0.81) | 18.72±0.34 (19.03)             | 60.1±1.2 (61.3) | 9.11±0.34 (9.45) |

<sup>a</sup> Statistical and optimal results are listed outside of parentheses and in parentheses, respectively. The average values are obtained from over 15 devices.

**Table S4.** The detailed photovoltaic performances of OSCs based on PBDB-T:**IDT2Se** and PBDB-T:**IDT2Se-4F** with different treatments. The active layer thickness is ~110 nm, and the D:A ratio (wt:wt) is 1:1. <sup>a</sup>

| Acceptor      | Treatment        |        | $V_{oc}$<br>(V)  | $J_{sc}$<br>(mA/cm <sup>2</sup> ) | FF<br>(%)          | PCE<br>(%)         |
|---------------|------------------|--------|------------------|-----------------------------------|--------------------|--------------------|
|               | SVA              | TA     |                  |                                   |                    |                    |
| <b>IDT2Se</b> | w/o              | w/o    | 0.89±0.01 (0.89) | 17.05±0.25 (17.08)                | 58.0±0.9 (58.6)    | 8.80±0.19 (8.91)   |
|               | 60 s             | w/o    | 0.89±0.01 (0.89) | 17.09±0.24 (17.18)                | 58.5±1.0 (59.5)    | 8.90±0.20 (9.10)   |
|               | 90 s             | w/o    | 0.89±0.01 (0.89) | 17.20±0.21 (17.31)                | 58.8±1.1 (59.9)    | 9.00±0.23 (9.23)   |
|               | 120 s            | w/o    | 0.88±0.01(0.88)  | 17.20± 0.30 (17.26)               | 58.6±0.8 (59.7)    | 8.87±0.20 (9.07)   |
|               | 90 s             | 80 °C  | 0.88±0.01 (0.89) | 17.31±0.20 (17.49)                | 59.8±1.0 (60.8)    | 9.11±0.25 (9.36)   |
|               | 90 s             | 100 °C | 0.88±0.01 (0.89) | 17.25±34 (17.59)                  | 59.4±1.2 (60.2)    | 9.02±0.30 (9.32)   |
|               | <b>IDT2Se-4F</b> | w/o    | w/o              | 0.81±0.01 (0.81)                  | 19.18±0.15 (19.28) | 62.3±1.0 (63.0)    |
| 60 s          |                  | w/o    | 0.81±0.01 (0.81) | 19.91±0.27 (20.00)                | 63.0±1.3 (64.0)    | 10.16±0.21 (10.37) |
| 90 s          |                  | w/o    | 0.80±0.01 (0.80) | 20.52±0.23 (20.75)                | 64.0±1.2 (64.8)    | 10.50±0.26 (10.76) |
| 120 s         |                  | w/o    | 0.80±0.01 (0.80) | 20.48±0.36 (20.60)                | 63.9±1.4 (65.0)    | 10.47±0.24 (10.71) |
| 90 s          |                  | 80 °C  | 0.79±0.01 (0.79) | 21.35±0.27 (21.49)                | 65.4±0.9 (65.9)    | 11.03±0.16 (11.19) |
| 90 s          |                  | 100 °C | 0.79±0.01 (0.79) | 21.00±0.50 (21.47)                | 64.1±0.8 (64.8)    | 10.63±0.36 (10.99) |

<sup>a</sup> Statistical and optimal results are listed outside of parentheses and in parentheses, respectively. The average values are obtained from over 15 devices.

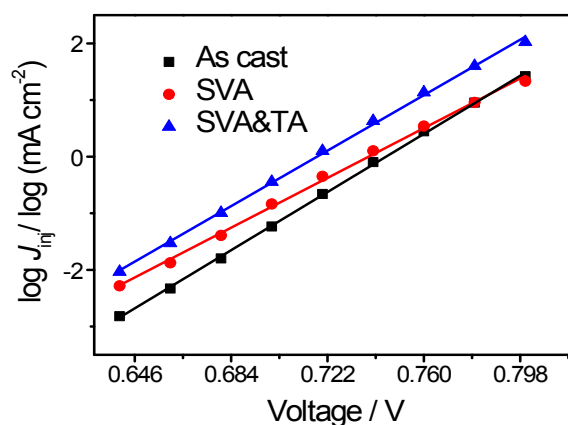

**Fig. S15.** The fitted dark injected current ( $J_{inj}$ ) versus voltage ( $V$ ) for the devices based on PBDB-T:**IDT2Se-4F** blend films with different treatment. <sup>a</sup>

<sup>a</sup> The dark injected current  $J_{inj}$  versus applied voltage for PBDB-T:**IDT2Se-4F** based devices was exponentially fitted according to Equation S1, therefore to determine reverse saturation current density  $J_{0,n}$ .

$$J_{inj} = J_{0,n} \exp\left(\frac{qV}{nkT}\right)$$

Equation S1<sup>1,2</sup>

**Table S5.** Measured and simulated performance parameters of the devices based on PBDB-T:IDT2Se-4F blend films with different treatments according to the dark  $J_{inj}$ - $V$  curves.<sup>a</sup>

| Treatment  | $V_{oc}/V$ | $J_{0,n}/\text{mA cm}^{-2}$ | $nkT/q$ | $J_{so}/\text{mA cm}^{-2}$ |
|------------|------------|-----------------------------|---------|----------------------------|
| As cast    | 0.81       | $1.79 \times 10^{-9}$       | 0.0370  | $7.65 \times 10^{-2}$      |
| SVA        | 0.80       | $3.86 \times 10^{-8}$       | 0.0432  | $1.31 \times 10^{-1}$      |
| SVA and TA | 0.79       | $9.15 \times 10^{-9}$       | 0.0388  | $1.74 \times 10^{-1}$      |

<sup>a</sup>  $J_{so}$  is calculated according to Equation 2.

$$J_{0,n} = J_{so} \exp\left(\frac{-\Delta E_{DA}}{2nkT}\right)$$

Equation S2<sup>2,3</sup>

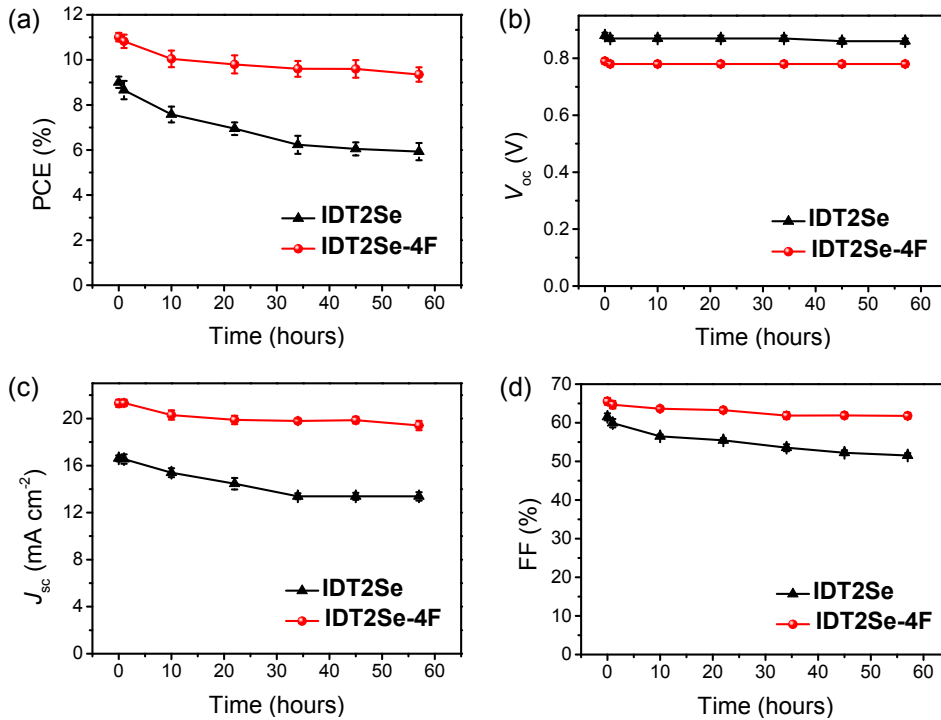

**Fig. S16** Photovoltaic parameters versus continuous illumination (AM 1.5G, 100 mW/cm<sup>2</sup>) time for PBDB-T:IDT2Se and PBDB-T:IDT2Se-4F based OSCs in an argon-filled glove box. The temperature of the devices under the lamp is around 50 °C. The error bars present standard deviations of at least ten devices averaged for each study.

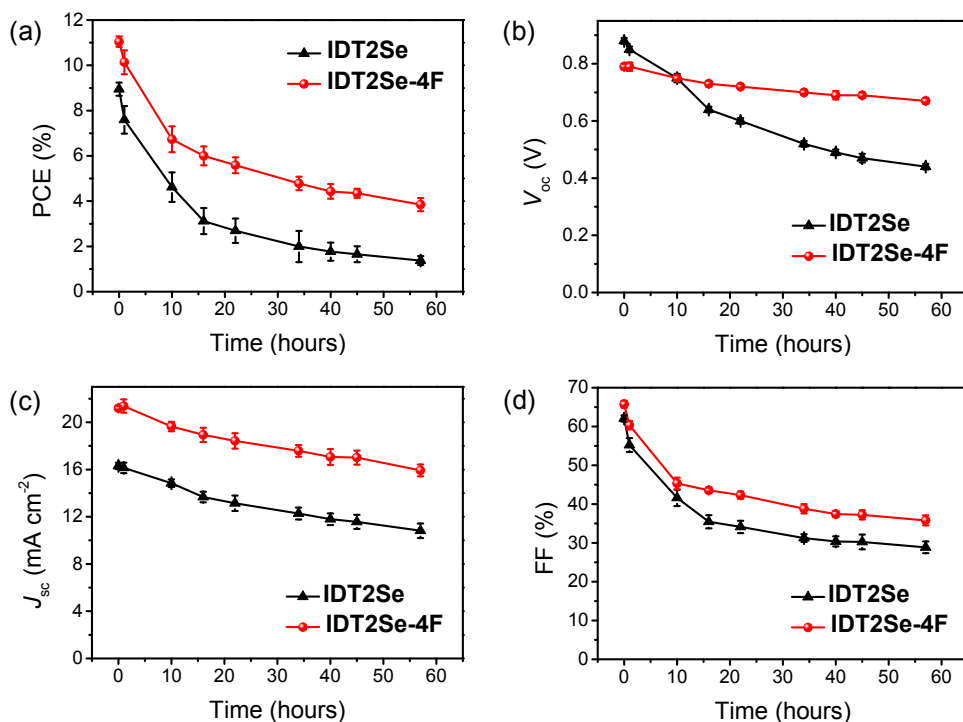

**Fig. S17** Photovoltaic parameters versus continuous heating time for PBDB-T:IDT2Se and PBDB-T:IDT2Se-4F based OSCs at 100 °C in an argon-filled glove box. The error bars present standard deviations of at least ten devices averaged for each study.

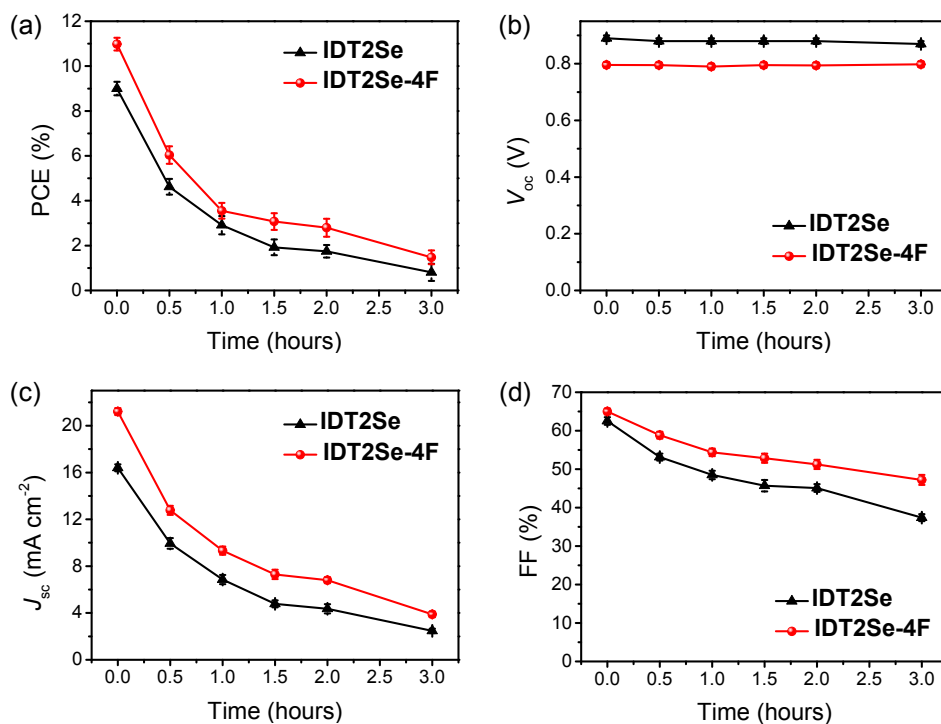

**Fig. S18** Photovoltaic parameters versus exposure time in air (relative humidity: ~30%, room temperature: 25 °C) for PBDB-T:IDT2Se and PBDB-T:IDT2Se-4F based OSCs. The error bars present standard deviations of at least ten devices averaged for each study.



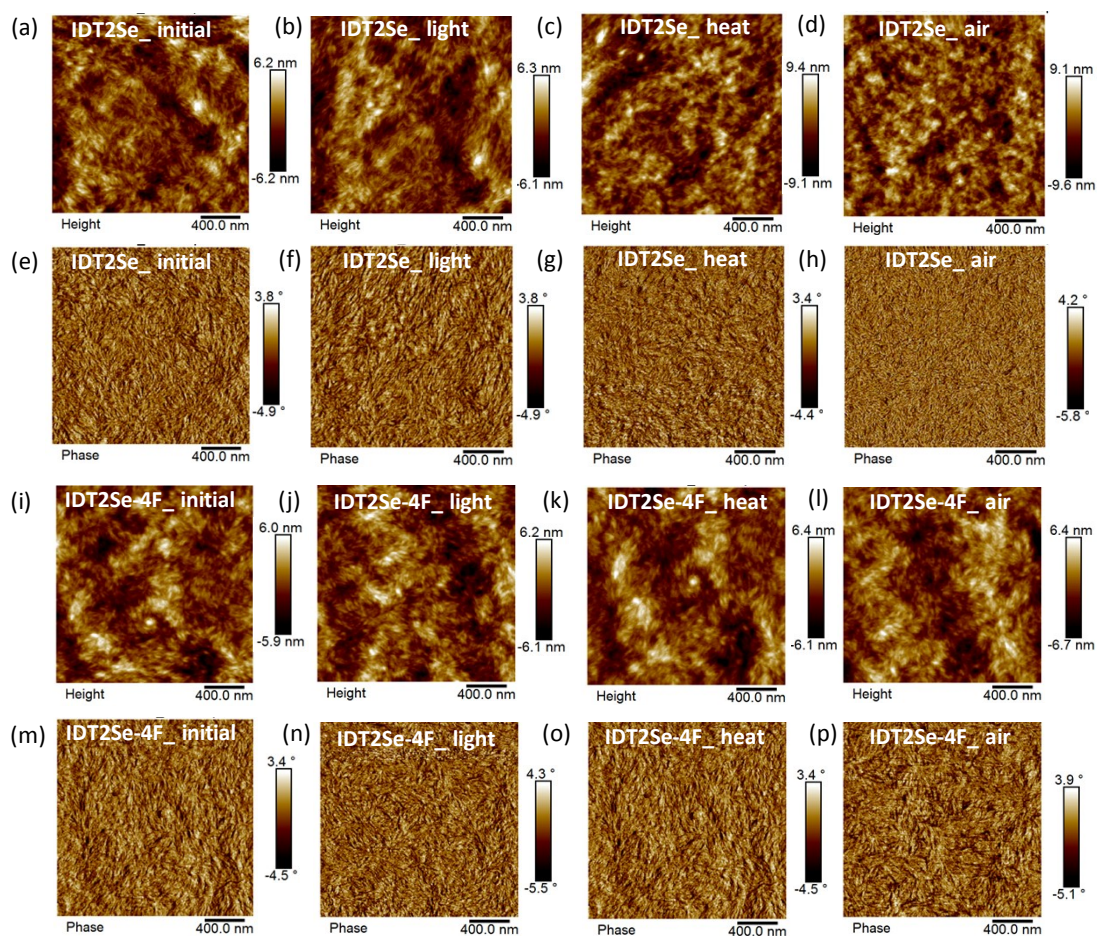

**Fig. S19** AFM height (a-d, i-l) and phase images (e-h, m-p) of PBDB-T:IDT2Se (a-h) and PBDB-T:IDT2Se-4F (i-p) blend films after continuous illumination (b, f, j, n) and heating (c, g, k, o) for 57 h, and exposure in air (d, h, l, p) for 74 h.

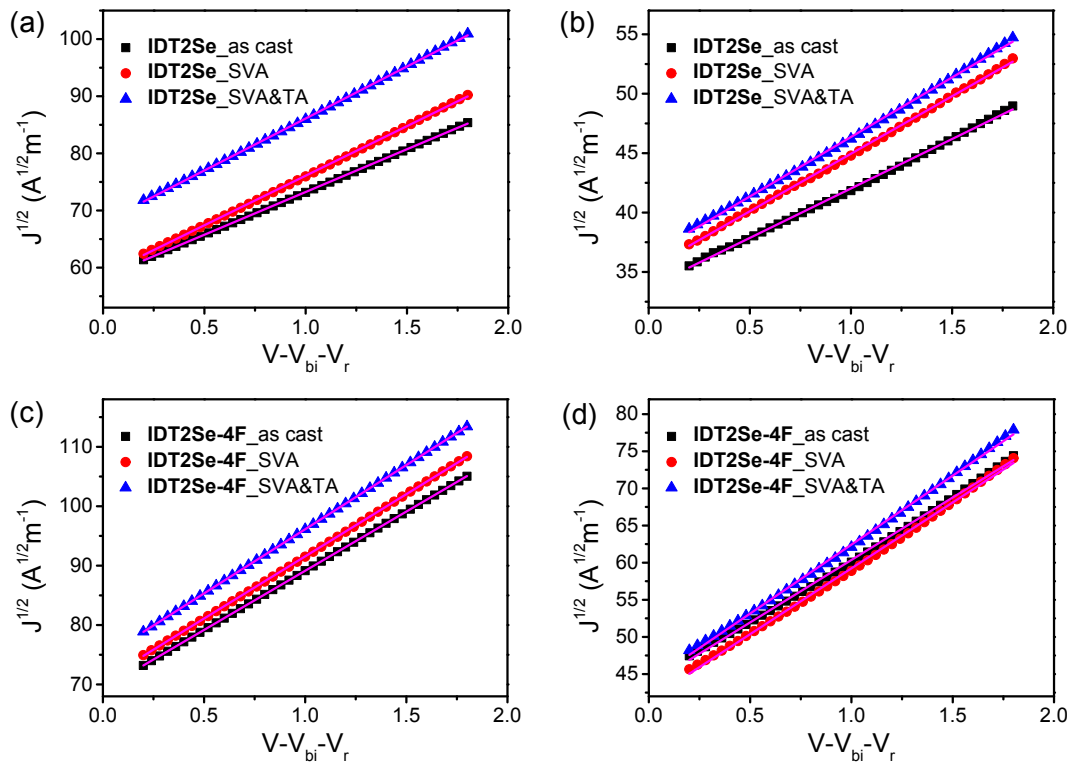

**Fig. S20**  $J$ - $V$  characteristics for the hole-only (a, c) and electron-only (b, d) devices fabricated with PBDB-T:IDT2Se (a, b) and PBDB-T:IDT2Se-4F (c, d). The solid lines represent the fit using a model of single carrier SCLC with field-independent mobility.

**Table S6** Carriers mobility of PBDB-T:IDT2Se and PBDB-T:IDT2Se-4F blends measured by the space charge limited current (SCLC) method.

| Blend film       | Treatments | $\mu_h$<br>( $\text{cm}^2\text{V}^{-1}\text{s}^{-1}$ ) | $\mu_e$<br>( $\text{cm}^2\text{V}^{-1}\text{s}^{-1}$ ) | $\mu_h/\mu_e$ |
|------------------|------------|--------------------------------------------------------|--------------------------------------------------------|---------------|
| PBDB-T:IDT2Se    | As cast    | 1.02                                                   | 0.33                                                   | 3.09          |
|                  | SVA        | 1.38                                                   | 0.44                                                   | 3.14          |
|                  | SVA and TA | 1.52                                                   | 0.48                                                   | 3.17          |
| PBDB-T:IDT2Se-4F | As cast    | 1.76                                                   | 1.34                                                   | 1.31          |
|                  | SVA        | 1.97                                                   | 1.50                                                   | 1.31          |
|                  | SVA and TA | 2.08                                                   | 1.64                                                   | 1.27          |

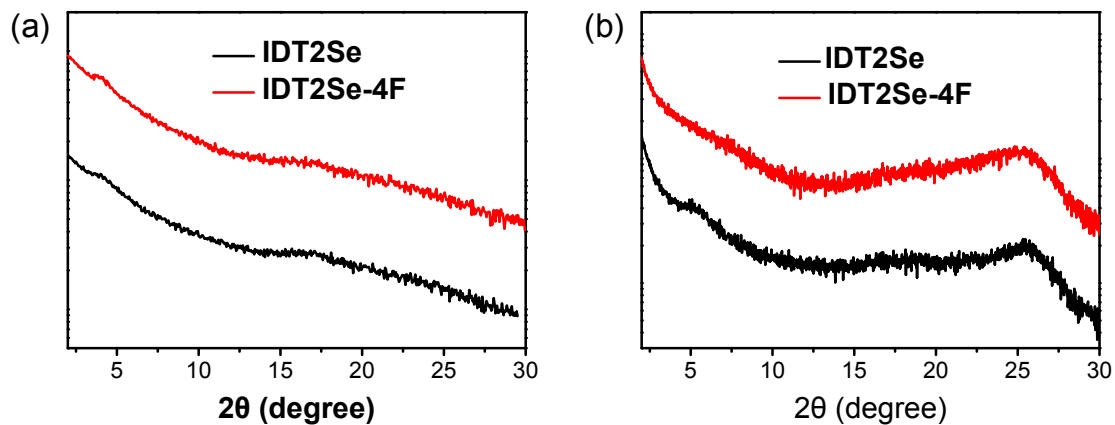

**Fig. S21** In-plane (a) and out-of-plane (b) XRD patterns of IDT2Se and IDT2Se-4F neat films.

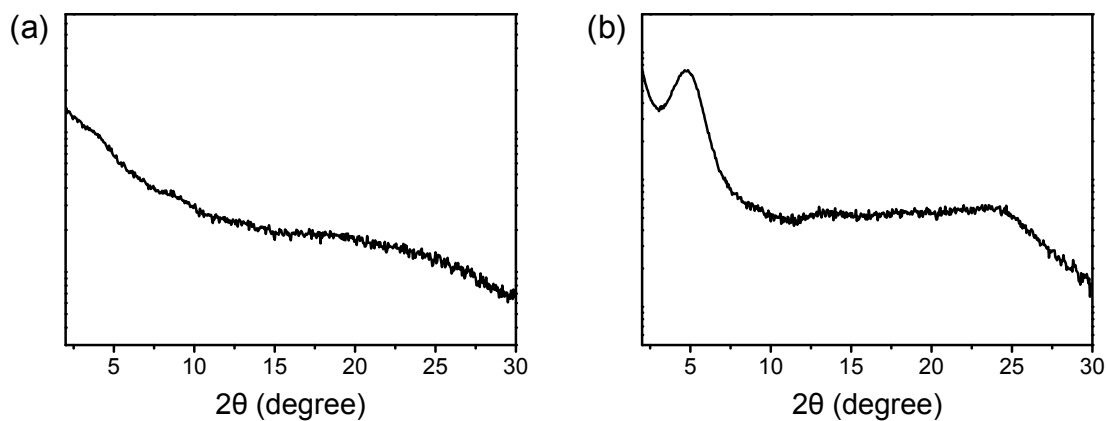

**Fig. S22** In-plane (a) and out-of-plane (b) XRD patterns of PBDB-T neat films.

### References

- 1 K. Vandewal, K. Tvingstedt, A. Gadisa, O. Inganäs, J. V. Manca, *Nat. Mater.*, 2009, **8**, 904.
- 2 G. Long, X. Wan, B. Kan, Y. Liu, G. He, Z. Li, Y. Zhang, Y. Zhang, Q. Zhang, M. Zhang, Y. Chen, *Adv. Energy Mater.*, 2013, **3**, 639.
- 3 C. W. Schlenker, M. E. Thompson, *Chem. Commun.*, 2011, **47**, 3702.
